# Supplementary material
Source: PubMed Central journal article supplement (PMC4974113)
Supplement: mmc1.pdf [file mmc1.pdf]

**The American Journal of Human Genetics, Volume 99**

## **Supplemental Data**

### **Defining KIR and HLA Class I Genotypes at Highest Resolution via High-Throughput Sequencing**

**Paul J. Norman, Jill A. Hollenbach, Neda Nemat-Gorgani, Wesley M. Marin, Steven J. Norberg, Elham Ashouri, Jyothi Jayaraman, Emily E. Wroblewski, John Trowsdale, Raja Rajalingam, Jorge R. Oksenberg, Jacques Chiaroni, Lisbeth A. Guethlein, James A. Traherne, Mostafa Ronaghi, and Peter Parham**

KFFallele  
workflow

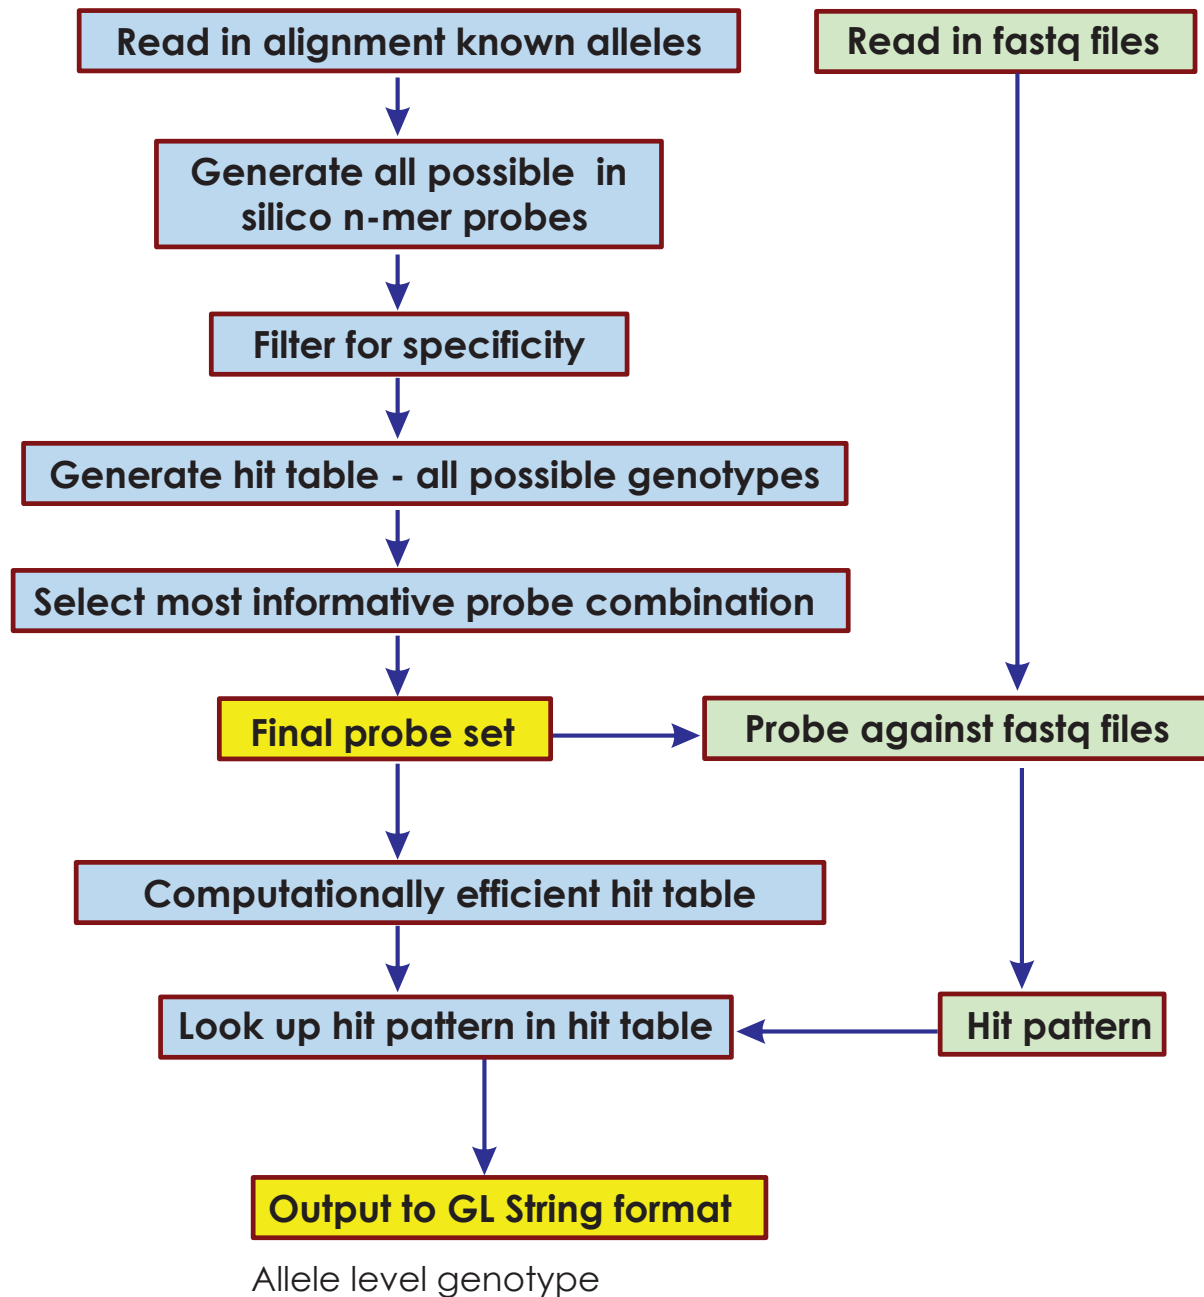

**Figure S1. Description of the PING\_allele workflow.**

A. The KFFallele component, which generates *KIR* allele genotypes using sequence string searches of the unprocessed sequence read data.

SOS  
workflow

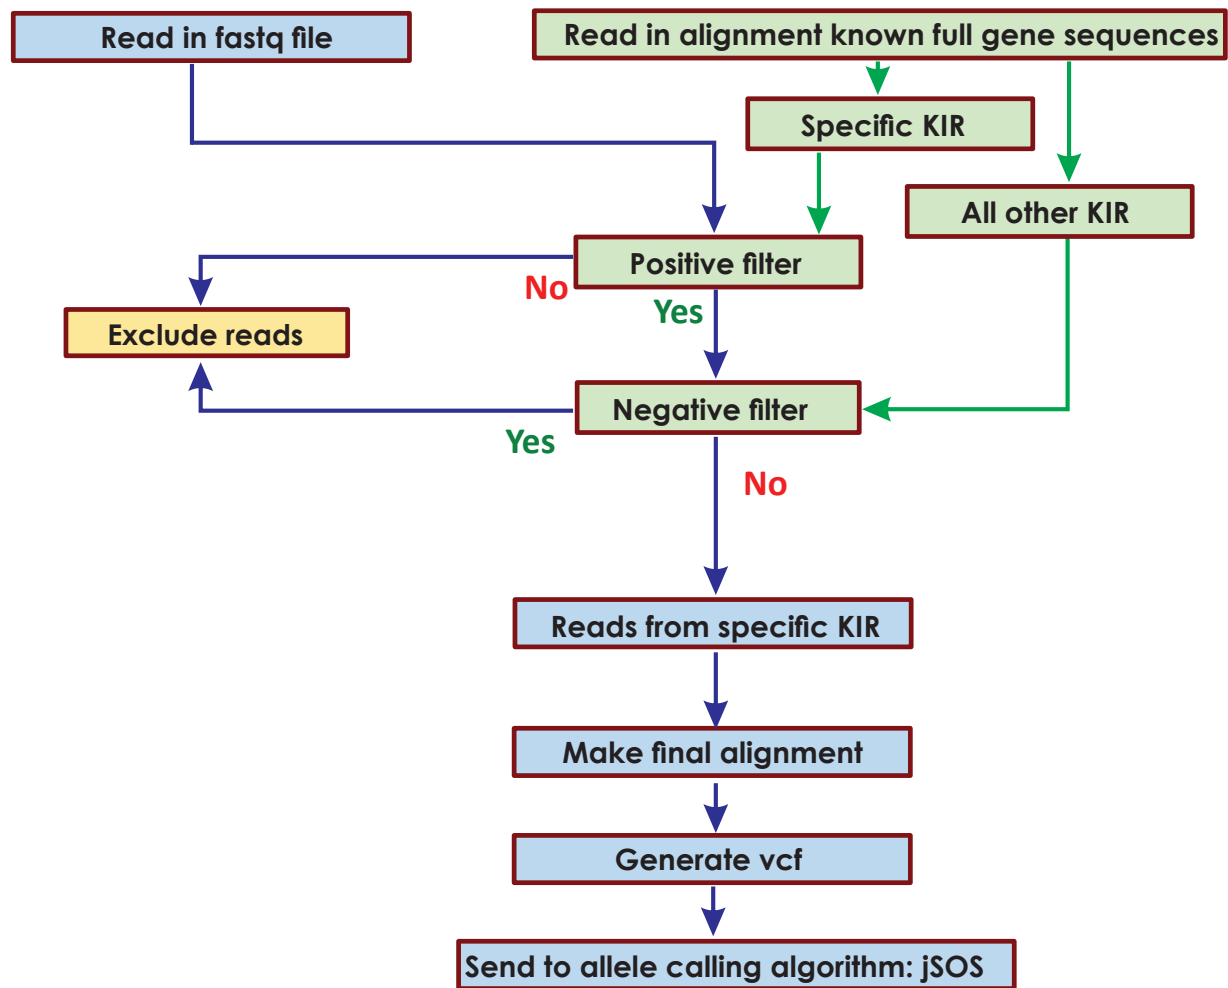

B. The SOS component, which selects sequence reads specific for individual *KIR* genes, generates an alignment to a selected reference sequence and then determines the alleles present using a bespoke algorithm, termed jSOS (Figure S1C).

jSOS (allele calling algorithm)  
workflow

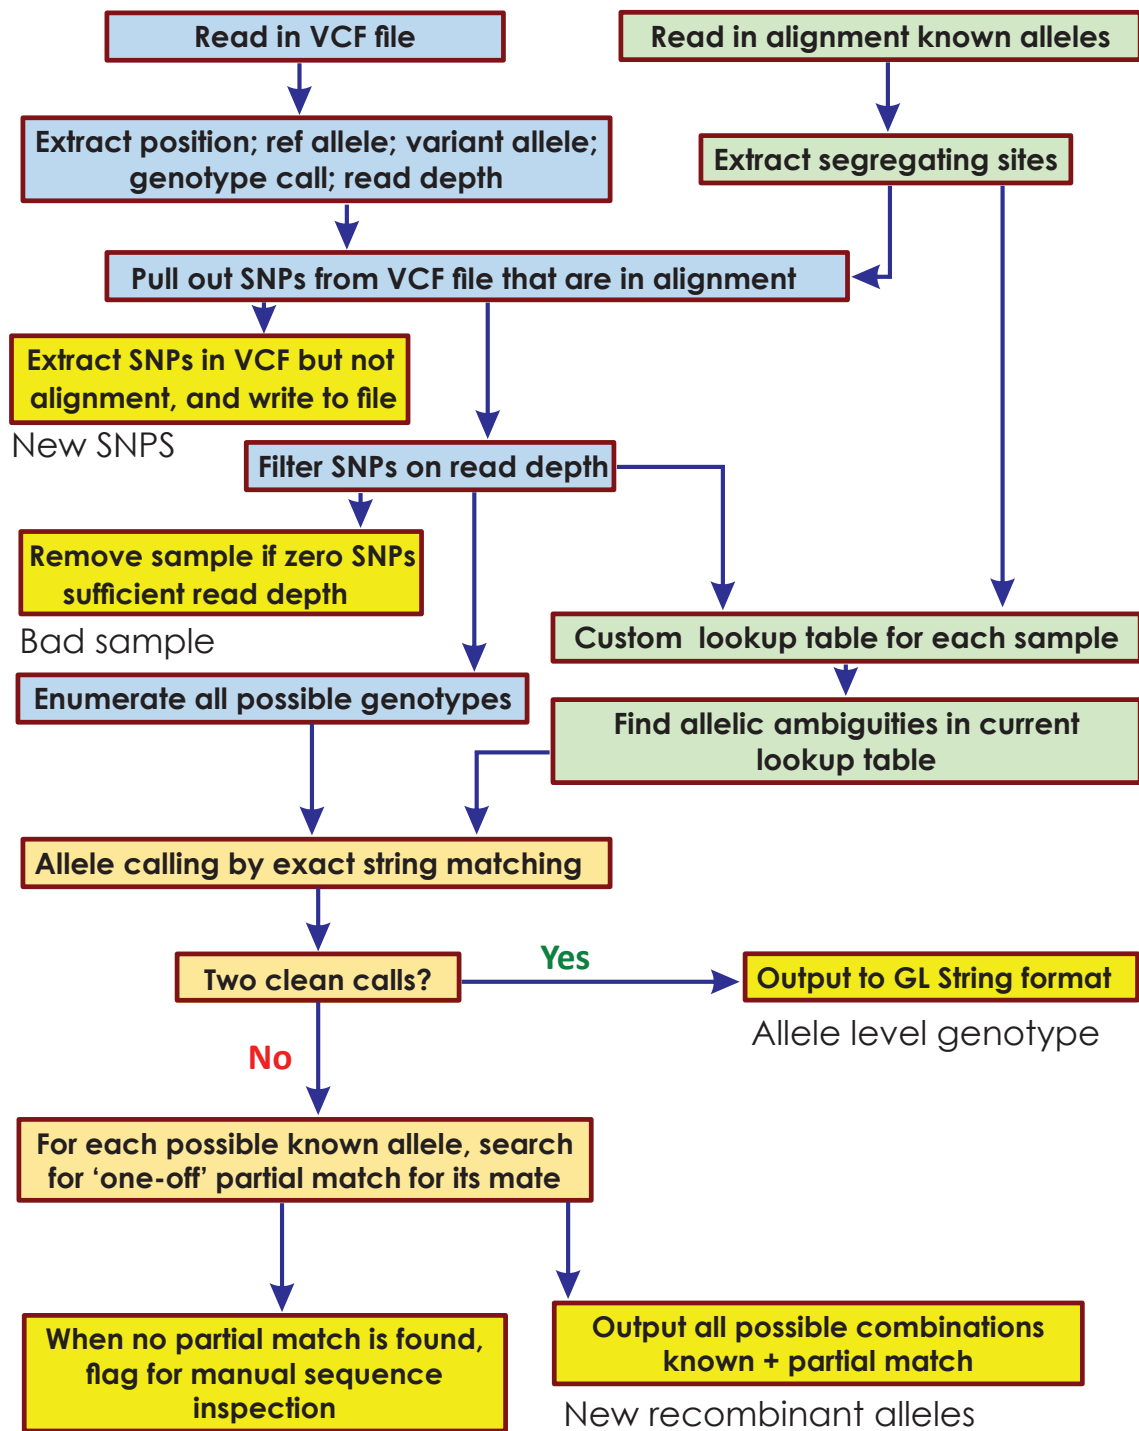

C. The jSOS allele-calling algorithm, which interprets the vcf files generated by SOS.

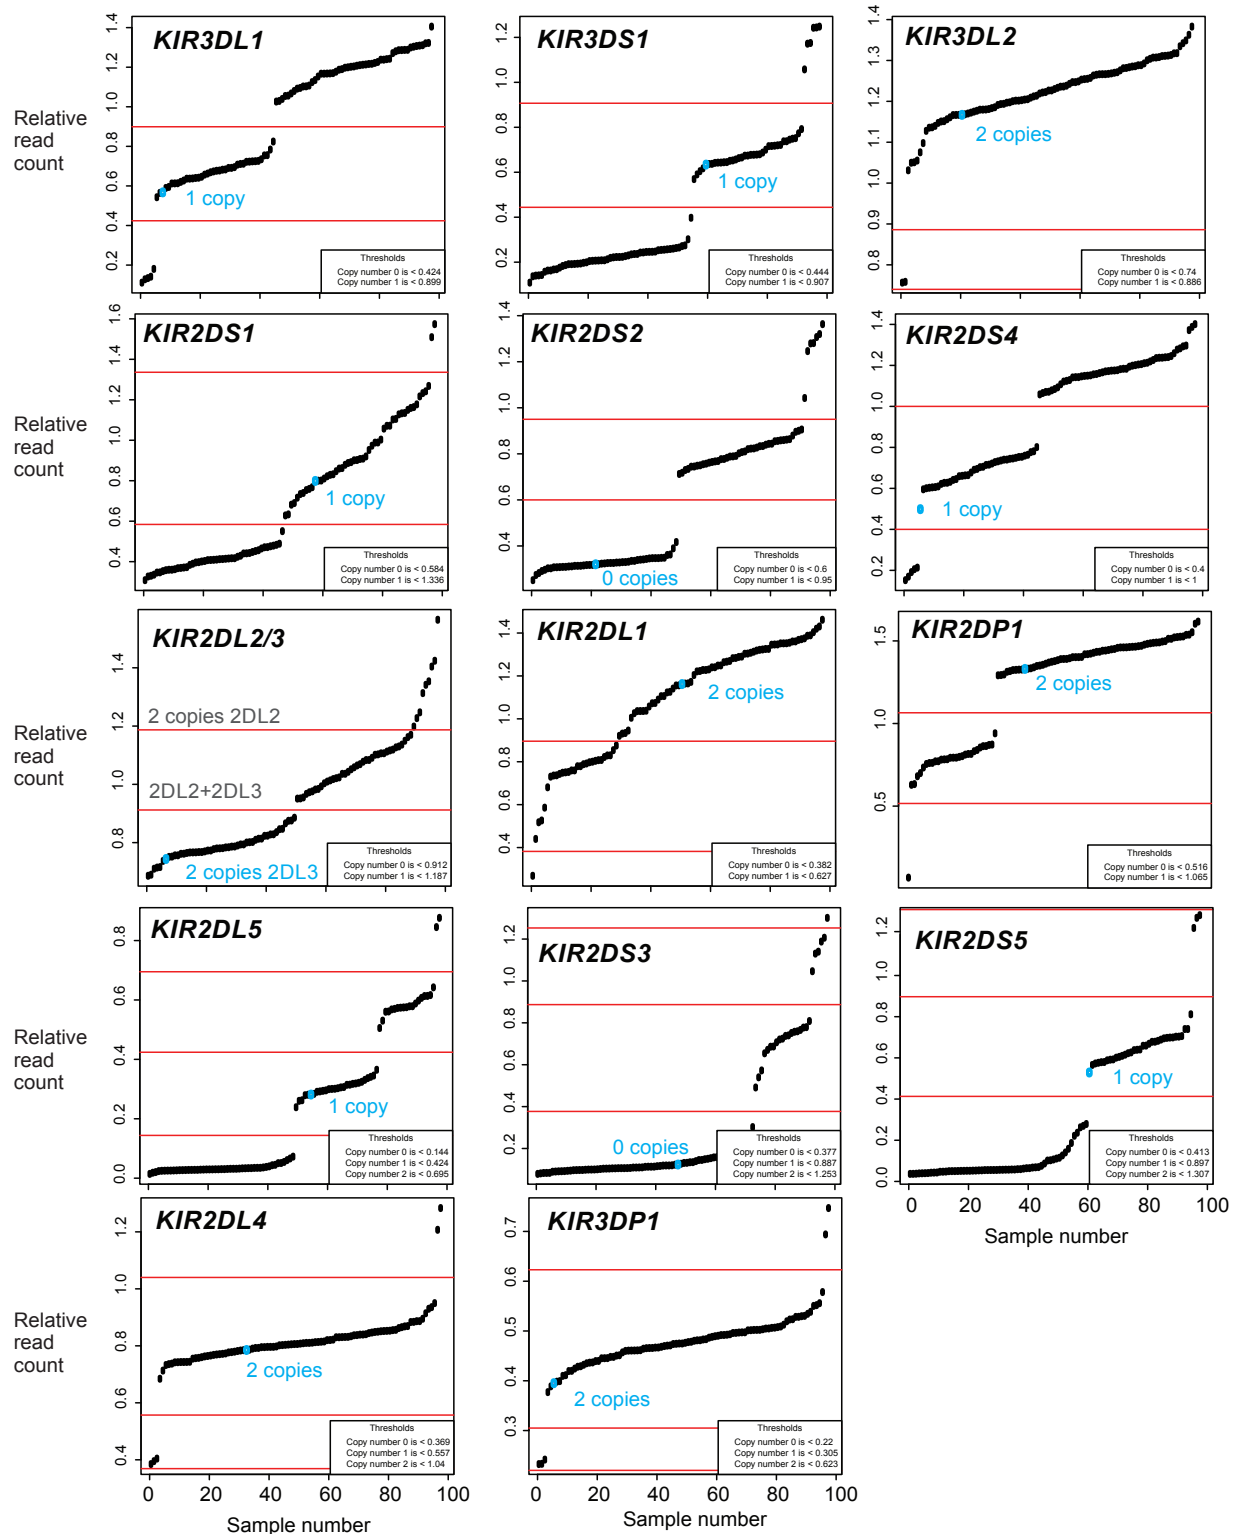

**Figure S2. Read ratio groupings**

Shown are MIRAgc plots for all *KIR* genes using 96 samples from DNA Set 3 (European controls) and sequenced using 2 x 300 bp MiSeq reads. Blue dots are the values obtained for the COX cell line, and the copy numbers (shown in blue text) match those obtained previously.<sup>1, 2</sup> Red lines are the threshold values set according to the groupings shown. The graphs were plotted using PING\_gc V1.0 (See Web Resources). For *KIR2DL2/3* the groups also allow discrimination of the three possible genotypes as indicated (*KIR2DL2/2*, *KIR2DL2/3* and *KIR2DL3/3*).

| KIR gene                     | Length (bp) | GenBank ID | Read ratio to determine copy number |      |     |     |
|------------------------------|-------------|------------|-------------------------------------|------|-----|-----|
|                              |             |            | 1                                   | 2    | 3   | 4   |
| <i>2DL1*00302</i>            | 14741       | AC011501   | 0.4                                 | 0.78 |     |     |
| <i>2DS1*002</i>              | 14720       | AL133414   | 0.6                                 | 1.2  |     |     |
| <i>2DL2*001</i> <sup>+</sup> | 14782       | AY320039   |                                     | 0.6  |     |     |
| <i>2DL4*00103</i>            | 11172       | GU182338   | 0.2                                 | 0.8  | 1.2 |     |
| <i>2DL5A*001</i>             | 9695        | AY320039   | 0.2                                 | 0.6  | 0.8 | 1.2 |
| <i>2DP1*002</i>              | 13125       | AC011501   | 0.2                                 | 0.7  | 1.3 |     |
| <i>2DS2*001</i>              | 14545       | AL133414   | 0.6                                 | 0.95 |     |     |
| <i>2DS3*00103</i>            | 15071       | AY320039   | 0.55                                | 0.9  | 1.3 |     |
| <i>2DS4*00101</i>            | 15213       | GU182338   | 0.4                                 | 1    |     |     |
| <i>2DS5*00201</i>            | 14996       | AY320039   | 0.53                                | 0.95 | 1.3 |     |
| <i>3DL1*00101</i>            | 14545       | AC011501   | 0.5                                 | 0.78 | 1   |     |
| <i>3DS1*01301</i>            | 14933       | AL133414   | 0.6                                 | 0.9  |     |     |
| <i>3DL2*00101</i>            | 17013       | AC011501   |                                     | 1.9  |     |     |
| <i>3DL3*00201</i>            | 12360       | AC011501   |                                     |      |     |     |
| <i>3DP1*002</i>              | 5713        | AL133414   | 0.2                                 | 0.25 | 0.5 |     |

**Figure S3. *KIR* gene content calculations**

Shows the reference gene sequences used to map sequence reads for gene content calculation for the 97 IHWG cell lines, which were sequenced using a 2 x 101 bp sequence run. The reads were filtered to be specific for the *KIR* region then mapped to all of the references simultaneously. The ratio of reads mapping to specific *KIR* / reads specific to *KIR3DL3* is used to calculate the copy number. The threshold values used to determine copy number are shown at the right. The accession numbers for reference alleles used for this purpose, as well as for PING\_allele, are shown at the center. (+) for *KIR2DL2/3* discrimination of the three possible genotypes of the broad allele groups (*KIR2DL2* and *KIR2DL3*) was possible. The following threshold values were determined for the cell line data; 0.6 - *KIR2DL3* + *KIR2DL3*, 0.77 - *KIR2DL2* + *KIR2DL3*, 1.1 - *KIR2DL2* + *KIR2DL2*.

| IHWG cell | Non-specific reads |           | Map to: |           |
|-----------|--------------------|-----------|---------|-----------|
|           | 300 X 300          | 100 X 100 | 3DL2i6  | Other KIR |
|           | N                  | N         | %       | %         |
| BOLETH    | 4                  | 7,898     | 100     | 0         |
| COX       | 1                  | 7,497     | 100     | 0         |
| DUCAF     | 2                  | 6,801     | 100     | 0         |
| ISH3      | 0                  | 8,363     | 100     | 0         |
| OMW       | 7                  | 4,683     | 100     | 0         |
| PGF       | 0                  | 8,290     | 100     | 0         |
| VAVY      | 0                  | 5,624     | 100     | 0         |
| WIN       | 2                  | 3,966     | 100     | 0         |

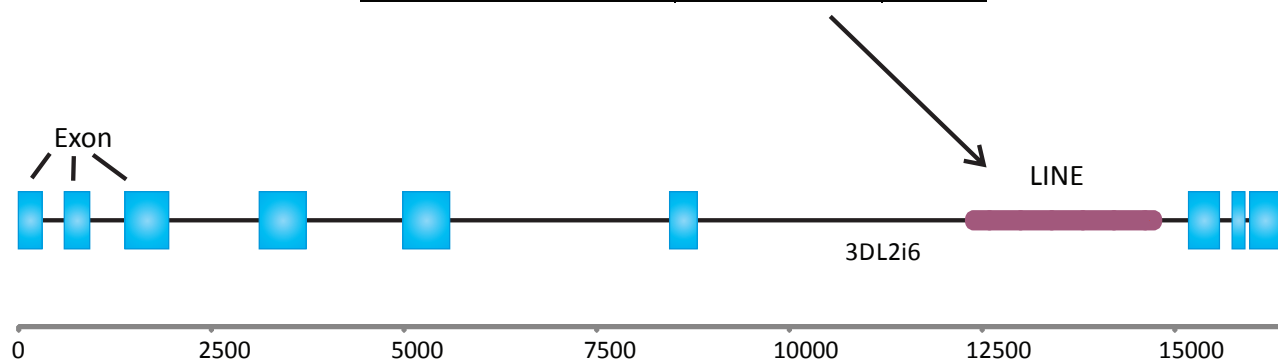

*KIR3DL2* gene coordinates (bp) ->

#### Figure S4. Potentially non-specific *KIR* reads

As part of the PING pipeline, sequence reads are filtered using a panel of reference haplotypes, in order to select those that originate from the *KIR* region. To test if any reads that may also map to elements outside the *KIR* region become selected in this process, they were re-mapped to the human genome (build 19). Shown are the results from eight cell lines that were each sequenced using two strategies (2 x 100 bp and 2 x 300 bp reads). All of those reads that could map outside *KIR* were selected and then mapped again to *KIR*, showing all of them originate from a single LINE element in intron 6 of *KIR3DL2*.

## Supplemental References

1. Jiang, W., Johnson, C., Jayaraman, J., Simecek, N., Noble, J., Moffatt, M.F., Cookson, W.O., Trowsdale, J., and Traherne, J.A. (2012). Copy number variation leads to considerable diversity for B but not A haplotypes of the human KIR genes encoding NK cell receptors. *Genome research* 22, 1845-1854.
2. Pyo, C.W., Guethlein, L.A., Vu, Q., Wang, R., Abi-Rached, L., Norman, P.J., Marsh, S.G., Miller, J.S., Parham, P., and Geraghty, D.E. (2010). Different patterns of evolution in the centromeric and telomeric regions of group A and B haplotypes of the human killer cell Ig-like receptor locus. *PloS one* 5, e15115.
3. Robinson, J., Halliwell, J.A., Hayhurst, J.D., Flicek, P., Parham, P., and Marsh, S.G. (2015). The IPD and IMGT/HLA database: allele variant databases. *Nucleic acids research* 43, D423-431.
4. Gomez-Lozano, N., Estefania, E., Williams, F., Halfpenny, I., Middleton, D., Solis, R., and Vilches, C. (2005). The silent KIR3DP1 gene (CD158c) is transcribed and might encode a secreted receptor in a minority of humans, in whom the KIR3DP1, KIR2DL4 and KIR3DL1/KIR3DS1 genes are duplicated. *European journal of immunology* 35, 16-24.
5. Norman, P.J., Abi-Rached, L., Gendzekhadze, K., Hammond, J.A., Moesta, A.K., Sharma, D., Graef, T., McQueen, K.L., Guethlein, L.A., Carrington, C.V., et al. (2009). Meiotic recombination generates rich diversity in NK cell receptor genes, alleles, and haplotypes. *Genome research* 19, 757-769.
6. Abecasis, G.R., Auton, A., Brooks, L.D., DePristo, M.A., Durbin, R.M., Handsaker, R.E., Kang, H.M., Marth, G.T., and McVean, G.A. (2012). An integrated map of genetic variation from 1,092 human genomes. *Nature* 491, 56-65.
7. Norman, P.J., Norberg, S.J., Nemat-Gorgani, N., Royce, T., Hollenbach, J.A., Shults Won, M., Guethlein, L.A., Gunderson, K.L., Ronaghi, M., and Parham, P. (2015). Very long haplotype tracts characterized at high resolution from HLA homozygous cell lines. *Immunogenetics* 67, 479-485.
